# Supplementary material for: Proteomics and machine learning identify a distinct biomarker panel to detect prodromal and early Parkinson’s disease
Source: Research Square preprint supplement (doi:10.21203/rs.3.rs-2787394/v1), 2023-04-17
Supplement: Supplementary file 1 [file 3c3cfcb3f2aca9da75f3106b.xlsx]

## Sheet: Tabelle1
	Supplementary Table S3. Peptides included in the targeted proteomic assay.	The peptides are represented by gene name, followed by protein name, and peptide amino acid sequence. The transition from precursor ion to product ions (quantifier and qualifier) are also shown. Internal standards are found at the bottom of the table in italics.
	Gene	Protein	AA sequence	Transitions (precursor > quant/qual)
	A2M	Alpha-2-macroglobulin	AFQPFFVELTMPYSVIR	1023.03 > 1079.59/1208.63
	ADIPOQ	Adiponectin	IFYNQQNHYDGSTGK	591.27 > 666.32/1106.49
	ANXA2	Annexin A2	TNQELQEINR	622.82 > 659.35/772.43
			TPAQYDASELK	611.8 > 825.4/1024.49
	APOE	Apolipoprotein E	LGPLVEQGR	484.78 > 588.31/701.39
	APP	Amyloid-beta precursor protein	GLTTRPGSGLTNIK	472.27 > 572.33/622.85
			YLETPGDENEHAHFQK	638.96 > 767.39/1010.48
	ATIC	Bifunctional purine biosynthesis protein PURH	DVSELTGFPEMLGGR	804.39 > 759.38/963.47
			HVSPAGAAVGIPLSEDEAK	616.65 > 847.44/888.43
	BCAP29	B-cell receptor-associated protein 29	SSTSRPDAYEHTQMK	435.2 > 468.72/504.23
	BCHE	Cholinesterase	YGNPNETQNNSTSWPVFK	1041.98 > 490.3/874.92
			YLTLNTESTR	599.31 > 707.33/921.46
	C15orf62	Chromosome 15 Open Reading Frame 62	EQFPSEPSF	534.24 > 350.17/718.3
			LPLWGDEQPR	605.81 > 701.32/887.4
	C3	Complement C3	TVMVNIENPEGIPVK	820.44 > 853.48/982.52
	CAPN2	Calpain-2 catalytic subunit	NFFLTNR	456.24 > 650.36/797.43
			SDTFINLR	483.26 > 515.33/763.45
	CCL2	C-C motif chemokine 2	WVQDSMDHLDK	458.54 > 845.38/960.41
	CCL4	C-C motif chemokine 4	NFVVDYYETSSLCSQPAVVFQTK	894.76 > 889.47/1104.56
	CCL13	C-C motif chemokine 13	SYVITTSR	463.75 > 577.33/676.4
	CCL17	C-C motif chemokine 17	DAIVFVTVQGR	602.84 > 806.45/905.52
	CCL22	C-C motif chemokine 22	HFYWTSDSCPRPGVVLLTFR	610.31 > 627.89/649.4
	CCL24	C-C motif chemokine 24	GQQFCGDPK	518.73 > 576.22/723.29
	CCL26	C-C motif chemokine 26	SYEFTSNSCSQR	733.3 > 838.35/939.39
	CD200R1	CD200 Receptor 1	QITQNYSK	491.09 > 370.66/740.45
	CD22	B-cell receptor CD22	EVQFFWEK	556.77 > 609.3/756.37
	CHI3L1	Chitinase-3-like protein 1	VTIDSSYDIAK	606.31 > 696.36/783.39
	COL4A2	Collagen alpha-2(IV) chain	GLDGYQGPDGPR	616.29 > 541.27/726.35
			SVSIGYLLVK	539.83 > 692.43/892.55
	COL6A3	Collagen alpha-3(VI) chain	QLGTVQQVISER	679.38 > 859.46/1116.6
	CPS1	Carbamoyl-Phosphate Synthase 1	FVHDNYVIR	388.2 > 458.74/779.4
	CRP	C reactive protein	APLTKPLK	289.86 > 586.39/699.48
			ESDTSYVSLK	564.77 > 696.39/797.44
	CS	Citrate synthase, mitochondrial	ALGVLAQLIWSR	663.92 > 448.06/561.1
	CSF1R	Colony Stimulating Factor 1 Receptor	NVLLTNGHVAK	583.34 > 625.34/726.39
			VVEATAFGLGK	546.31 > 764.43/893.47
	CST3	Cystatin-C	ALDFAVGEYNK	613.81 > 780.39/927.46
	CTHRC1	Collagen Triple Helix Repeat Containing 1	GDASTGWNSVSR	618.78 > 805.4/906.44
	CUL5	Cullin-5	YVEQLLTLFNR	698.39 > 763.45/876.53
	CYCS	Cytochrome c	GIIWGEDTLMEYLENPK	670 > 763.35/892.39
			TGPNLHGLFGR	390.21 > 505.78/534.29
	DCXR	L-xylulose reductase	AVIQVSQIVAR	592.36 > 772.47/900.53
			TQADLDSLVR	559.39 > 474.52/888.86
	DKK3	Dickkopf WNT signalling pathway inhibitor 3	EVPDEYEVGSFMEEVR	957.92 > 843.87/1053.5
			SAVEEMEAEEAAAK	732.83 > 949.43/1078.47
	EFNA5	Ephrin A5	VENSLEPADDTVHESAEPSR	728 > 755.84/820.36
			VFDVNDK	418.71 > 590.28/737.35
	ENDOU	Endonuclease, poly(U) specific	YGSEQEFVDDLK	715.33 > 865.43/1266.58
	EPO	Erythropoietin	EVWQGLALLSEAVLR	842.78 > 674.61/1141.94
			TITADTFR	462.74 > 609.3/710.35
	FABP5	Fatty acid binding protein 5	ELGVGIALR	464.28 > 529.35/685.44
			TTQFSTLGEK	556.29 > 781.41/909.47
	FGA	Fibrinogen alpha chain	AQLVDMK	402.72 > 492.25/605.33
			GLIDEVNQDFTNR	760.87 > 894.41/1237.54
	FGF2	Basic fibroblast growth factor 2	LESNNYNTYR	637.29 > 716.34/830.38
	FGF21	Fibroblast growth factor 21	EDGTVGGAADQSPESLLQLK	672.34 > 464.28/701.46
			YLYTDDAQQTEAHLEIR	689.33 > 813.89/895.42
	GRN	Granulin precursor	AVALSSSVMCPDAR	732.35 > 1022.44/1109.47
			ENATTDLLTK	553.29 > 690.4/791.45
	HBE1	Hemoglobin subunit epsilon	EFTPEVQAAWQK	717.36 > 830.45/1056.55
			MNVEEAGGEALGR	666.81 > 730.38/859.43
	HELLS	Lymphoid-specific helicase	LISQIQPEVDR	649.36 > 743.37/984.51
	HPX	Hemopexin	YYCFQGNQFLR	748.34 > 862.45/1009.52
	HSPA1L	Heat shock 70 kDa protein 1-like	VEIIANDQGNR	614.82 > 703.31/774.35
	HSPA5	Endoplasmic reticulum chaperone BiP	ITITNDQNR	537.78 > 747.34/860.42
	HSPA8	Heat shock cognate 71 kDa protein	DAGTIAGLNVLR	600.34 > 742.46/855.54
	HSP90AB1	Heat shock protein HSP 90-beta	SIYYITGESK	580.8 > 634.34/797.4
	HSPD1	Heat Shock Protein Family D (Hsp60) Member 1	VTDALNATR	480.76 > 645.37/760.39
	ICAM1	Intercellular adhesion molecule 1	ASVSVTAEDEGTQR	725.34 > 834.36/1006.44
			LLGIETPLPK	540.84 > 797.48/854.5
	IFNG	Interferon gamma	AIHELIQVMAELSPAAK	911.15 > 386.13/473.19
			IMQSQIVSFYFK	745.89 > 903.5/1031.56
	IL1A	Interleukin-1 alpha	ESMVVVATNGK	567.79 > 589.33/688.4
	IL1B	Interleukin-1 beta	SLVMSGPYELK	612.32 > 793.41/924.45
	IL2	Interleukin-2	DLISNINVIVLELK	791.97 > 813.54/927.59
	IL4	Interleukin-4	EANQSTLENFLER	775.88 > 807.4/920.48
	IL5	Interleukin-5	TLLIANETLR	572.34 > 703.37/816.46
	IL6	Interleukin-6	YILDGISALR	560.82 > 616.38/844.49
	IL7	Interleukin-7	LNDLCFLK	511.77 > 680.38/795.41
	IL10	Interleukin-10	AMSEFDIFINYIEAYMTMK	1159.71 > 379.34/510.43
			DQLDNLLLK	536.31 > 715.43/828.52
	IL12A	Interleukin-12 subunit alpha	TSTVEACLPLELTK	781.41 > 700.4/1173.6
	IL12B	Interleukin-12 subunit beta	EDGIWSTDILK	638.82 > 676.39/862.47
	IL13	Interleukin-13	ELIEELVNITQNQK	835.95 > 944.52/1057.6
	IL15	Interleukin-15	TEANWVNVISDLK	744.89 > 788.45/887.52
	IL16	Pro-interleukin-16	DPGVSESPPPGR	597.79 > 739.37/925.47
	IRAK4	Interleukin-1 receptor-associated kinase 4	SANILLDEAFTAK	696.87 > 781.37/894.46
	ITIH2	Inter-alpha-trypsin inhibitor heavy chain 2	TEVNVLPGAK	514.29 > 698.42/797.49
			VQFELHYQEVK	473.91 > 666.35/803.4
	LMO7	LIM domain only protein 7	KPQDQLVIER	409.23 > 417.25/710.38
	MAPK12	Mitogen-activated protein kinase 12	VTGTPPAEFVQR	651.35 > 472.25/846.45
	MASP2	Mannan binding lectin serine peptidase 2	AGYVLHR	408.23 > 425.26/524.33
			WPEPVFGR	494.26 > 575.33/801.43
	MMP3	Matrix metallopeptidase 3	GNQFWAIR	496.26 > 545.32/692.39
			TYFFVEDK	524.75 > 637.32/784.39
	MSN	Moesin	EDAVLEYLK	540.28 > 552.3/665.39
	MUC5B	Mucin 5B, oligomeric mucus/gel-forming	ATNSTATPSSTLGTTR	783.39 > 919.48/1020.53
	NCAM1	Neural cell adhesion molecule 1	DGQLLPSSNYSNIK	768.39 > 1009.49/1122.58
			LEGQMGEDGNSIK	689.32 > 819.38/950.42
	NDRG1	N-myc downstream regulated 1	ISGWTQALPDMVVSHLFGK	696.03 > 615.32/787.45
			MADCGGLPQISQPAK	786.88 > 868.49/1038.59
	NEFL	Neurofilament light polypeptide	VLEAELLVLR	577.86 > 613.44/813.52
			YEEEVLSR	512.75 > 603.35/732.39
	NEFM	Neurofilament medium polypeptide	FVEEIIEETK	618.82 > 732.41/990.5
			SIELESVR	466.76 > 490.26/732.39
	NEFH	Neurofilament heavy polypeptide	LEQEHLLEDIAHVR	426.23 > 595.37/710.39
			TSVSSVSASPSR	582.8 > 604.3/877.44
	NFATC2	Nuclear Factor Of Activated T Cells 2	YQQQNPAAVLYQR	789.9 > 820.47/917.52
	NFKBIZ	NF-kappa-B inhibitor zeta	ASGQAVDDFK	519.25 > 694.34/879.42
	NLRP3	NLR Family Pyrin Domain Containing 3	YLEDLEDVDLK	676.34 > 831.45/946.47
	OLR1	Oxidised low-density lipoprotein receptor 1	QQAEEASQESENELK	573.93 > 719.36/848.4
	PGAM1	Phosphoglycerate mutase 1	AMEAVAAQGK	488.25 > 644.37/773.42
	PGK1	Phosphoglycerate kinase 1	VLPGVDALSNI	549.5 > 466.54/885.84
	PKM	Pyruvate kinase M	ITLDNAYMEK	599.29 > 755.34/791.39
	PLAU	Urokinase-type plasminogen activator	SDALQLGLGK	501.28 > 615.38/728.47
	PLD3	Phospholipase D Family Member 3	ALLNVVDNAR	542.81 > 574.29/787.41
			LLISCWGHSEPSMR	558.27 > 667.27/723.82
	PPP3CB	Protein Phosphatase 3 Catalytic Subunit Beta	GLTPTGMLPSGVLAGGR	792.43 > 656.86/813.46
	PRDX3	Peroxiredoxin 3	GLFIIDPNGVIK	643.38 > 742.41/855.49
	PRG4	Proteoglycan 4	GFGGLTGQIVAALSTAK	795.95 > 1058.62/1159.67
	PTGDS	Prostaglandin-H2 D-isomerase	AQGFTEDTIVFLPQTDK	955.51 > 363.41/588.56
			TMLLQPAGSLGSYSYR	872.44 > 989.47/1157.56
	PTGES2	Prostaglandin E synthase 2	QWADDWLVHLISPNVYR	704.54 > 735.46/848.62
	RANGAP1	Ran GTPase-activating protein 1	AFNSSSFNSNTFLTR	564.94 > 637.34/751.38
			VINLNDNTFTEK	704.36 > 968.43/1195.56
	SAA1	Serum amyloid A-1 protein	EANYIGSDK	498.74 > 682.34/796.38
			SFFSFLGEAFDGAR	776.22 > 303.33/822.63
	SELE	E-selectin	YTHLVAIQNK	396.22 > 573.34/672.4
	SERPINA1	Alpha-1-antitrypsin	LSSWVLLMK	538.81 > 603.39/876.5
	SERPINA3	Alpha-1-antichymotrypsin	LYGSEAFATDFQDSAAAK	946.44 > 952.44/1053.48
	SERPINF2	Alpha-2-antiplasmin	HQMDLVATLSQLGLQELFQAPDLR	908.65 > 500.13/1112.82
			LGNQEPGGQTALK	656.85 > 674.38/771.44
	SERPING1	Plasma protease C1 inhibitor	LVLLNAIYLSAK	659.41 > 765.45/992.58
	SMC4	Structural Maintenance Of Chromosomes 4	SNNIINETTTR	631.82 > 721.35/834.43
	SNAP25	Synaptosomal-associated protein 25	AWGNNQDGVVASQPAR	557.27 > 558.3/629.34
			HMALDMGNEIDTQNR	582.26 > 633.3/746.38
	SOD2	Superoxide Dismutase 2	LTAASVGVQGSGWGWLGFNK	1018.02 > 1064.53/1208.58
	SOD3	Superoxide Dismutase 3	AGLAASLAGPHSIVGR	492.95 > 582.83/618.35
			VTGVVLFR	445.78 > 534.34/690.43
	SPP2	Secreted Phosphoprotein 2	DALSASVVK	445.25 > 503.32/590.35
			VNSQSLSPYLFR	705.87 > 695.39/782.42
	TEK	Angiopoietin-1 receptor	IVDLPDHIEVNSGK	512.61 > 548.28/662.33
	THY1	Thy-1 Cell Surface Antigen	HVLFGTVGVPEHTYR	428.73 > 401.7/479.74
	TLR6	Toll-like receptor 6	DMPSLEILDVSWNSLESGR	1074.49 > 948.79/1035.89
	TNF	Tumour necrosis factor (alpha)	ANALLANGVELR	620.85 > 758.42/871.5
			DNQLVVPSEGLYLIYSQVLFK	1213.38 > 570.24/669.35
	TNFB	Lymphotoxin-alpha	MHLAHSTLKPAAHLIGDPSK	531.79 > 331.2/619.35
	TNNT3	Troponin T3	DLMELQALIDSHFEAR	629.98 > 764.89/830.41
	TOLLIP	Toll-interacting protein	GPVYIGELPQDFLR	802.43 > 775.41/1074.56
			LNITVVQAK	493.31 > 645.39/758.48
	TRAP1	Heat shock protein 75 kDa, mitochondrial	ELGSSVALYSR	591.31 > 609.34/882.47
	TUBA4A	Tubulin alpha-4A chain	AVFVDLEPTVIDEIR	858.46 > 942.53/1299.68
			DVNAAIAAIK	493.29 > 586.39/771.47
	TXN	Thioredoxin	LEATINELV	501.22 > 474.11/528.24
	UBC	Polyubiquitin-C	TITLEVEPSDTIENVK	894.47 > 905.46/1002.51
	VCAM1	Vascular cell adhesion protein 1	LHIDEMDSVPTVR	756.59 > 251.23/472.42
			NTVISVNPSTK	580.32 > 732.39/944.54
	VEGFA	Vascular endothelial growth factor A	SWSVYVGAR	512.76 > 565.31/751.41
	VEGFC	Vascular endothelial growth factor C	FAAAHYNTEILK	459.91 > 580.31/615.83
	VEGFD	Vascular endothelial growth factor D	FAATFYDIETLK	709.86 > 718.4/881.46
	#N/A	AP_ALDOA_ALQ	ALQASALK	404.75 > 496.32/624.38
	#N/A	AP_C3_SSL	SSLSVPYVIVPLK	704.43 > 357.25/934.6
	#N/A	AP_GSTO1_GSA	GSAPPGPVPEGSIR	664.36 > 556.81/1015.56
	#N/A	AP_RSU1_ALY	ALYLSDNDFEILPPDIGK	1014.03 > 633.37/746.37
	#N/A	AP_TSP1_TIV	TIVTTLQDSIR	627.36 > 940.52/1039.59
	#N/A	ENO1_YEAST_GNP	GNPTVEVELTTEK	709.06 > 623.49/948.68
